# Supplementary material
Source: Springer Nature journal article supplement (https://www.springermedizin.de/resource/supplementary/12889_2009_2312_MOESM3_ESM.pdf/9485352)
Supplement: MOESM3 [file 9485352]

**Behaviour intentions:**

attitude, knowledge,  
trust, caution,  
received assurances

**Behaviour change  
or risk exposure:**

condom use,  
fewer partners

**Health indicators:**

HIV incidence,  
morbidity,  
mortality

**TIME**



**Immediate  
outcomes**

**Intermediate  
outcomes**

**Final  
outcomes**
